# Supplementary material for: In silico characterization of the family of PARP-like poly(ADP-ribosyl)transferases (pARTs)
Source: PubMed Central journal article supplement (PMC1266365; doi:10.1186/1471-2164-6-139), 2005-10-04
Supplement: 1471-2164-6-139-S1.pdf [file 1471-2164-6-139-S1.pdf]

| gene     | number of ESTs in cluster |        |        |        |        |        | Unigene cluster | tissues   |
|----------|---------------------------|--------|--------|--------|--------|--------|-----------------|-----------|
|          | Oct 99                    | Jun 01 | Jun 03 | Feb 02 | 0ct 03 | 0ct 04 |                 |           |
| A) pARTs |                           |        |        |        |        |        |                 |           |
| 1        | 157                       | 339    | 492    | 527    | 756    | 862    | Hs.177766       | PNC / LNG |
| 2        | 54                        | 58     | 78     | 84     | 120    | 122    | Hs.409412       | SPL / LNG |
| 3        | 23                        | 24     | 40     | 64     | 109    | 109    | Hs.271742       | LNG / LVR |
| 4        | 106                       | 132    | 187    | 202    | 282    | 337    | Hs.117825       | LNG / TMS |
| 5        | 81                        | 108    | 181    | 188    | 260    | 298    | Hs.370267       | PST / BRN |
| 6        |                           |        | 129    | 134    | 205    | 430    | Hs.329327       | SPC / MSL |
| 7        |                           | 7      | 10     | 12     | 8      | 12     | Hs.120250       | LYN / UTR |
| 8        |                           | 10     | 241    | 252    | 298    | 331    | Hs.518203       | LNG / BMR |
| 9        |                           |        | 122    | 132    | 226    | 243    | Hs.518200       | LNG / PNC |
| 10       | 47                        | 25     | 67     | 152    | 279    | 290    | Hs.348609       | SPL / TMS |
| 11       |                           | 10     | 12     | 16     | 33     | 99     | Hs.504538       | BMR / PST |
| 12       | 51                        | 67     | 115    | 134    | 183    | 187    | Hs.12646        | KDN / PST |
| 13       |                           | 62     | 93     | 96     | 288    | 312    | Hs.133512       | BMR / SPL |
| 14       | 39                        | 87     | 140    | 145    | 196    | 214    | Hs.12813        | LVR / LNG |
| 15       |                           |        |        |        | 107    | 116    | Hs.30634        | TMS / PST |
| 16       |                           |        | 61     | 64     | 121    | 166    | Hs.369581       | TMS / SPL |
| 17       |                           |        | 161    | 175    | 286    | 304    | Hs.270244       | SPL / BRN |
| B) other |                           |        |        |        |        |        |                 |           |
| PARG     | 28                        | 34     | 73     | 88     | 82     | 77     | Hs.91390        | BMR / LVR |
| HPRT     | 46                        | 67     | 148    | 178    | 273    | 299    | Hs.412707       | SPL / KDN |
| GAPD     | >2000                     | >3700  | >10000 | >10000 | >15000 | >15000 | Hs.479728       | MSL / HRT |
| ART1     | 0                         | 0      | 0      | 0      | 1      | 1      | Hs.382188       | MSL       |
| ART2P    | 0                         | 0      | 0      | 0      | 0      | 0      | --              | --        |
| ART3     | 21                        | 35     | 66     | 74     | 87     | 95     | Hs.24976        | MSL / HRT |
| ART4     | 9                         | 9      | 11     | 11     | 16     | 23     | Hs.13776        | LVR / KDN |
| ART5     | 3                         | 4      | 3      | 10     | 13     | 17     | Hs.125680       | LVR / MSL |
