# Supplementary material for: In silico characterization of the family of PARP-like poly(ADP-ribosyl)transferases (pARTs)
Source: PubMed Central journal article supplement (PMC1266365; doi:10.1186/1471-2164-6-139), 2005-10-04

# A human Chromosome 3q

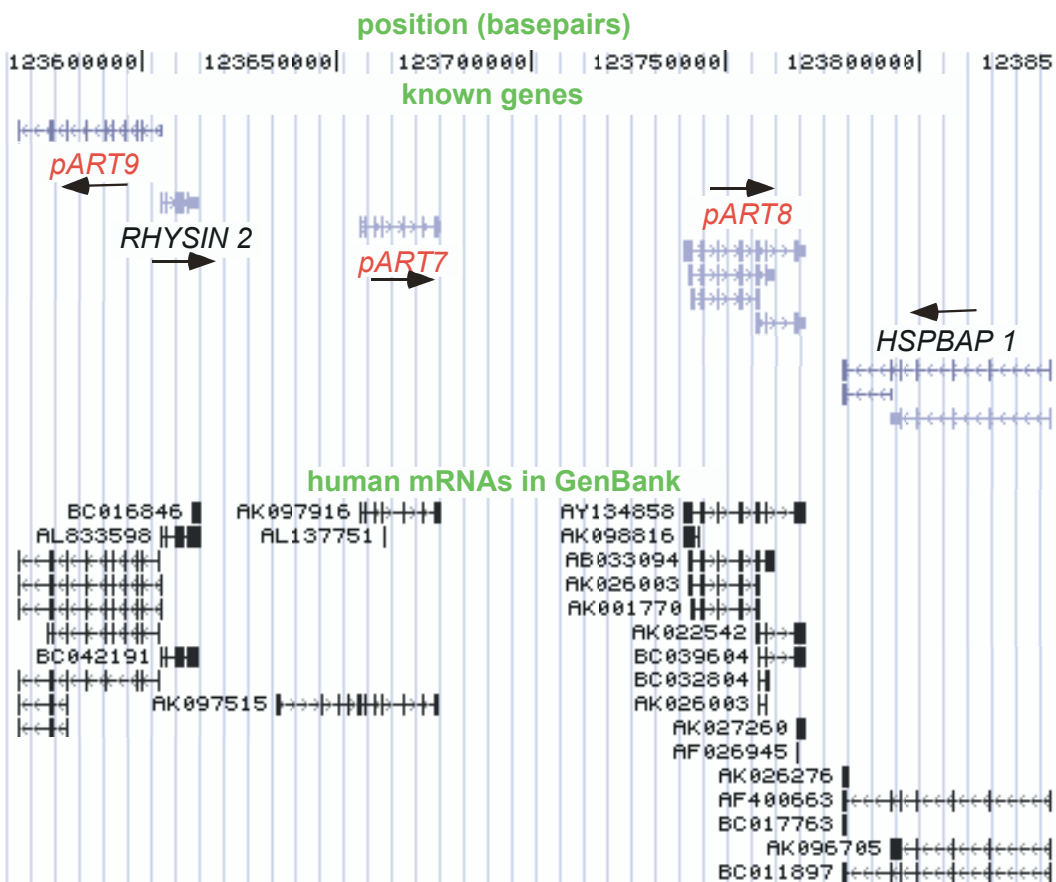

# B murine Chromosome 16B3

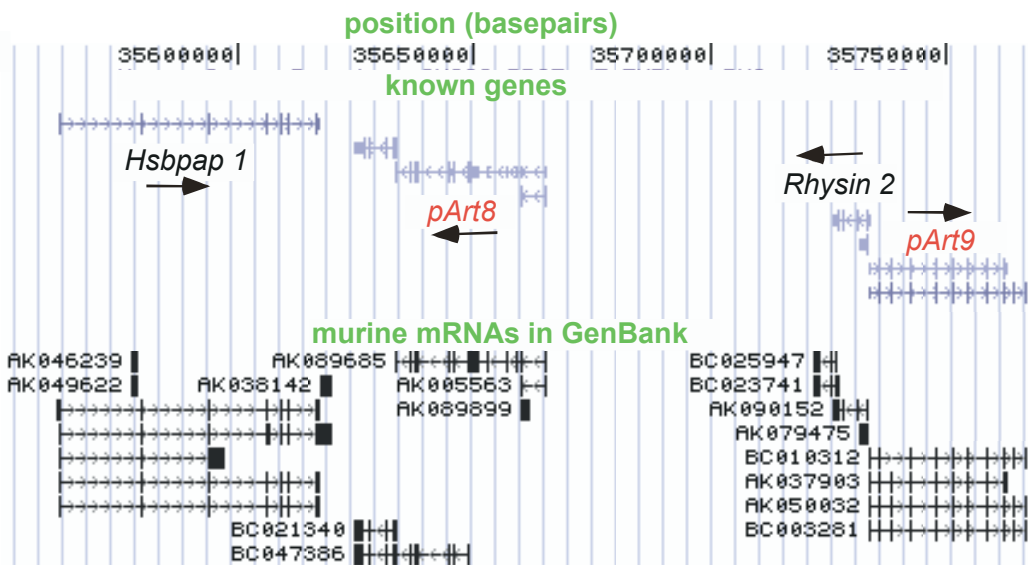

Supplement: 1471-2164-6-139-S2.pdf [file 1471-2164-6-139-S2.pdf]
