# Supplementary material for: In silico characterization of the family of PARP-like poly(ADP-ribosyl)transferases (pARTs)
Source: PubMed Central journal article supplement (PMC1266365; doi:10.1186/1471-2164-6-139), 2005-10-04
Supplement: 1471-2164-6-139-S3.pdf [file 1471-2164-6-139-S3.pdf]

```

1GS0 HHHHHHHHTTTTT S EEEEE EEEEEETTHHHHS --TT S EEEEEEE GGGHHHH
1a26 -----EEEEETTHHHHHGGGGSS EEEEEEE GGGHHHH
1a26 -----IFRIEREGESQRYKPFKQLHNRQLLW HGSRTTNFAGI
hs1 -----IFKIEREGECQRYKPFKQLHNRRLW HGSRTTNFAGI
mm1 -----IFKIEREGESQRYKPFKQLHNRRLW HGSRTTNFAGI
hs2 VISQYLQSTHAPTHSDYTM TLLDLFVEVEKDEKEA FR--EDLHN RMLLW HGSRMSNWVGI
mm2 VISQYLQSTHAPTHKDYTM TLLDVFEVEKEGEKEA FR--EDLPN RMLLW HGSRLSNWVGI
hs3 VIQTYLEQT---GSNHRCP TLOHIWKVNQEGEEDRFQAH SKLGNRKLW HGTNMAVVAAI
mm3 AIQTYLKQT---GNSYRCP DLRHVWKVNREGEEDRFQAH SKLGNRRLW HGTNVAVVAAI
hs4 -----S KSPVDVLQIFRVGRVNETTEFL--SKLGNVRPLL HGPSVQNI VGI
mm4 -----S EQPVDILQIFRVGRVNEATEFL--SKLGNVRLLF HGPSVVRN IGI
cons : : : : . * : : * * * * *
pr1 -----CEEEEC CCHHHHHHCCCEEEEEEECCCHHHHHH
conf -----9156315553367888507984799855985799999

```

```

                                B2      a2      B3
1GS0 HHH S--- SSS GGG--TTTSSSEEEESSHHHHHGGG SS--S EEEEEEEEEEE
1a26 HHH S--- TTTTGGG--TTT S EEEESSHHHHHTTS SS--S EEEEEEEEEEE
1a26 LSQGL---RIAPPEAPVTG--YMF GKGIYFADMVSKSANYCHTSQA--DPIGLILLGEVA
hs1 LSQGL---RIAPPEAPVTG--YMF GKGIYFADMVSKSANYCHTSQA--DPIGLILLGEVA
mm1 LSQGL---RIAPPEAPVTG--YMF GKGIYFADMVSKSANYCHTSQA--DPIGLILLGEVA
hs2 LSHGL---RIAPPEAPITG--YMF GKGIYFADMSK SANYCFASRL--KNTGLLLLSEVA
mm2 LSHGL---RVAPPEAPITG--YMF GKGIYFADMSK SANYCFASRL--KNTGLLLLSEVA
hs3 LTSGL---RIMPHSG-----GRV GKGIYFASENSKSAGYVIGMKCAHHVGYMFLGEVA
mm3 LTSGL---RIMPHSG-----GRV GKGIYFASENSKSAGYVITMHC CGHQVGYMFLGEVA
hs4 LCRGLLLPKVVEDRGVQRTDVGNLGSGIYFSDSLSTS IKYSHPGET--DGTRLLLCIDVA
mm4 LSRGLLLPKVAEDRGVQRTDVGNLGSGIYFSDSLSTS IKYAHAGET--DGSRLLVCDVA
cons * ** : : . . . * . * . * . . . : : : **
pr1 HHHCC---CCCCCCCCC--CEECCEEEEC CCHHHHHHCCCCC--CCEEEEEEEEEE
conf 87068---67864156346--4210327861300123202136888--870289986553

```

```

                                B4
1GS0 SEEEESS TTGGGGTTT SEEEE SEE GGG EEET--T--EEE S EE -
1a26 SEEEESS SS- TT EEEE BEEEE TTT EEET--T--EEE EEE -S
1a26 LGNMYELKNASHITK-LPKGKHSVKGLGKTAPDPTATT TLD--G--VEVPLNGIST-GI
hs1 LGNMYELKHASHISK-LPKGKHSVKGLGKTTPDPSANISLD--G--VDVPLGTGISS-GV
mm1 LGNMYELKHASHISK-LPKGKHSVKGLGKTTPDPSASITL--G--VEVPLGTGIPS-GV
hs2 LGQCNELLEANPKAEGLLQGK HSTKGLGKMAPSSAHFVTLN--G--STVPLGPASDT-GI
mm2 LGQCNELLEANPKAQLLRGKHSTKGMGKMAPSPAHFITLN--G--STVPLGPASDT-GI
hs3 LGREHHINTDNP SLKSPPPGFDSVIARGHTEPDP AQDIELELDGQV VVVPQGQPVP CPEF
mm3 LGKEHHITIDDP SLKSPSPGFDSVIARGQTEPDP AQDIELELDGQV VVVPQGPPVQCPSF
hs4 LGKCMDLHEKDFPLTEAPPGYDSVHGVSQTASVTTD-----
mm4 LGKCVNLFFKDFSLTEAPPGYDSVHGVS ETTSVPTD-----
cons ** . : : . . * . * . . . . : :
pr1 EEEEEEECCCCHHC-CCCCCEEEEC CCCCCCCCCCEEEEC--C--EEEECCCCC-CC
conf 130345307801313-8887650787046678873332226--4--55207888688-75

```

```

                                B5      B6
1GS0 SSS SB EEEES GGEEEE EEEEEEEEE- -----
1a26 --- S SBSB EEEES GGEEEE EEEEEEEEE -----
1a26 ---NDTCLLYNEYI VYDVAQVNLKYLLKLFNYKTS-----
hs1 ---NDTSLLYNEYI VYDIAQVNLKYLLKLFNFKTS LW-----
mm1 ---NDTCLLYNEYI VYDIAQVNLKYLLKLFNFKTS LW-----
hs2 LNP DGYTLNNEYI VYNPNQVRMRYLLKVQFNFLQLW-----
mm2 LNPEGYTLNNEYI VYSPNQVRMRYLLKIQFNFLQLW-----
hs3 ---SSSTFSQS EYLIYQESQRLRYLLEVHL-----
mm3 ---KSSSFSQS EYLIYKESQRLRYLLEIHL-----
hs4 -----FEDDEFVYKTNQVKMKYI IKFSMPGDQIKDFHPSDH
mm4 -----FQDDEFVYKTNQVKMKYIVKFC TPGDQIKEFH PHEN
cons : * : : * . * : : * : :
pr1 ---CCCCCCCCCEEEEC CCEEEEEEEEEEEEEEECCCCC-----
conf ---76540455127867864437999999871100279-----

```
