# Supplementary material for: In silico characterization of the family of PARP-like poly(ADP-ribosyl)transferases (pARTs)
Source: PubMed Central journal article supplement (PMC1266365; doi:10.1186/1471-2164-6-139), 2005-10-04
Supplement: 1471-2164-6-139-S4.pdf [file 1471-2164-6-139-S4.pdf]

B1

1a26 EEEEEETTHHHHHHGGGGGS-----S EEEEEEE GGGHHHHHHH S TTTTGG  
 1a26 IFRIEREGESQRYKPFKQL-----HNRQLLW<sup>H</sup>GSRTTNFAGILSQGLRIAPPEAVPT  
 hs5 IQKVVNKKLRERFCHROKEVSEENHNHNNERMLF<sup>H</sup>CGSP--FINAIIHKGFD---ERHAYI  
 mm5 IQKVVNKKLRERFCHROKEVSEENHNHNNERMLF<sup>H</sup>CGSP--FINAIIHKGFD---ERHAYI  
 hs5 IQKVCNKKLWERYTHRRKEVSEENHNHANERMLF<sup>H</sup>CGSP--FVNAIHKGFD---ERHAYI  
 mm5 IQKVCNKKLWERYTHRRKEVSEENHNHANERMLF<sup>H</sup>CGSP--FVNAIHKGFD---ERHAYI  
 cons \*\*\*\*\* \*:\*\*\*\*\* \*\*\*\*\*\*---\*:\*\*\*\*\*-----\*\*\*\*\*  
 pr5 CEEEECHHHHHHHHHHHHHHHHHHHCCCCCEEEEECCC--HHHHHHCCCC---CCCCC  
 conf 9032066799999999999987379875377874470--03788844888---466778

B2

α2

B3

1a26 GTTT SSEEESHHHHHTS----- SSS---- EEEEEEEEE SEEESS  
 1a26 GYMF<sup>G</sup>KGI<sup>Y</sup>FADMVSKSAN<sup>Y</sup>C-----HTSQAD----PIGLILLGEVALGNMYELKN  
 hs5 GGMFGAGI<sup>Y</sup>FAENSSKSNQYVYGIGGGTGCPTHKDRSCYICHR<sup>Q</sup>MLFCRVTLGKSFLQFS  
 mm5 GGMFGAGI<sup>Y</sup>FAENSSKSNQYVYGIGGGTGCPTHKDRSCYICHR<sup>Q</sup>MLFCRVTLGKSFLQFS  
 hs5 GGMFGAGI<sup>Y</sup>FAENSSKSNQYVYGIGGGTGC<sup>P</sup>VHKDRSCYICHR<sup>Q</sup>LLFCRVTLGKSFLQFS  
 mm5 GGMFGAGI<sup>Y</sup>FAENSSKSNQYVYGIGGGTGC<sup>P</sup>IHKDRSCYICHR<sup>Q</sup>LLFCRVTLGKSFLQFS  
 cons \*\*\*\*\*\*\*\*\*\*:\*\*\*\*\*  
 pr5 CCCCCCEEECCCCCCCCCCCCCCCCCCCCCCCCCEEEEEEECCCCEEECCC  
 conf 88123855541244220000256655445543344443333168998860176121157

B4

B5

1a26 SS TT EEEE BEEE TTT EETTEEE EEE S S SBSB EEEES G  
 1a26 ASHITKLPKGKHS<sup>V</sup>KGLGKTAPDPTATTTLDGVEVPLGNGISTGINDTCLLYNE<sup>E</sup>YIVYDV  
 hs5 TMKMAHAPPGHHSVIGR-----PSVNG-----LAYA<sup>E</sup>YVIYRG  
 mm5 TMKMAHAPPGHHSVIGR-----PSVNG-----LAYA<sup>E</sup>YVIYRG  
 hs5 AMKMAHSPPGHHSVTGR-----PSVNG-----LALA<sup>E</sup>YVIYRG  
 mm5 AMKMAHSPPGHHSVTGR-----PSVNG-----LALA<sup>E</sup>YVIYRG  
 cons :\*\*\*\*\*:\*\*\*\*\* \*\*-----\*\*\*\*\*-----\*\* \*  
 pr5 CCCCCCCCCCCCCEEC-----CCCC-----CCCEEEEEEC  
 conf 74478888788752546-----75788-----89870588768

B6

1a26 GGEEE EEEEEEEEE -----  
 1a26 AOVNLK<sup>Y</sup>LLKLFNYKTS-----  
 hs5 EQAYPEYLITYQIMKPEAPSQTATAAEQKT  
 mm5 EQAYPEYLITYQIMKPEAPSQTATAAEQKT  
 hs5 EQAYPEYLITYQIMRPEGMVDG-----  
 mm5 EQAYPEYLITYQIVRPEGMVDG-----  
 cons \*\*\*\*\*:\*\*\*: :  
 pr5 CEEEEEEEEEEEECCCCCCCCCCCCCCCC  
 conf 652068989989822458876644110059
