# Supplementary material for: In silico characterization of the family of PARP-like poly(ADP-ribosyl)transferases (pARTs)
Source: PubMed Central journal article supplement (PMC1266365; doi:10.1186/1471-2164-6-139), 2005-10-04
Supplement: 1471-2164-6-139-S5.pdf [file 1471-2164-6-139-S5.pdf]

B1

1a26 EEEEEETTHHHHHGGGGG-----SS EEEEEEE GGGHHHHHHH S TTTT  
 1a26 IFRIEREGESQRYKPFKQ-----LHNRQLLWHGSRTTNFAGILSQGLRIAPPEAP  
 hs7 IERIQNAFLWQSYQVKKRQMDIKNDHKNNERLLFHGTDADSVPYVNQHGFNR--SCAG  
 hs8 IERIQNPDLWNSYQAKKKTMDAKNGQTMNEKQLFHGTDAGSVPHVNRNGFNR--SYAG  
 mm8 IERIQNPALWRRYQAYKKGMDEKNGNVRNEKHLFHGTEASSLPQLNSNGFNR--SYAG  
 hs9 VEKIDNEVLMAAFQRKKKMMEEKLHRQPVSHRFLQQVPYQFCNVVCRVGFQR--MYST  
 mm9 VEQIDNKVLLAAFOEKKKMMEERTPKGSGSQRLFQQVPHQFCNTVCRVGFHR--MYST  
 hs10 VERVSHPLLQOQYELYRERLLQRCERRPVEQVLYHGTTAPAVPDICAHGFNR--SFCG  
 mm10 VERVSHPLLQOQYQLHRERLLMQSCQRPVEQVLYHGTSESAVLDICAHGFNR--SFCG  
 cons :\*::: \* :: : . : . : \*:: . : \*::\*-- .  
 pr7 CCEECCHHHHHHHHHHHHHHHHHHHHHCCCCCEEEEECCCHHHHHHHHHHHCCCC--CCCC  
 conf 9120287899999999999999987289843067760589789999999826887--7578

β2 α2 β3

1a26 GGGTTT SEEEESSHHHHHTTS - SSS EEEEEEEEEEE SEEEESS -----  
 1a26 VTGYMFGKGIYFADMVSKSAN<sup>Y</sup>CHT-SQADPIGLILLGEVALGNMYELKNA-----S  
 hs7 KNAVSYGKGTYFAVDASYSAKD<sup>T</sup>YSKPDNSGRKHMVYVVRVLTGVFTKGRAGLVTPPPK  
 hs8 KNAVAYGKGTYFAVNANYSAND<sup>T</sup>YSRDPANGRKHVYVVRVLTGIYTHGNHSLIVPPSK  
 mm8 KNATAYGKGTYFAVKASYSACD<sup>T</sup>YSRDPD<sup>T</sup>NGRKYMYVVRVLTGNYTNGNASLIVPPSR  
 hs9 PCDPKYGAGIYFTKNLKNLAEKAKKISAADKLIYVFEAEVLTGFFCQGHPLNIVPPPL  
 mm9 RYNPTVYGAGIYFTKRLNLADKVKKTSSTDKLIYVFEAEVLTGSFCQGRSNIIPPL  
 hs10 SNAFVYKGVYFAKASLSVQDRYSPPNADGHKAVFVARVLTGDYQOGRRLRAPPLR  
 mm10 RNTLYGQGVYFAKRASLSVLD<sup>R</sup>YSPPNAEGYKAVFVAQVLTGDYQGSRGLKAPPLR  
 cons \*\* \* \*\*: . . . . : : : : . . \*\*\*\* : : \* \*\*  
 pr7 CCCCCCEEEEECCCCCHHHCCCCCCCCCCCCCEEEEEEEEECCCCCCCCCCCCCCCC  
 conf 6777125404531432101101035647887479998753103424787130116767

β4 β5

1a26 SS TT EEEE BEEEE TTT EEETTEEE EEE S S SBSB EEEES G  
 1a26 HITKLPKGKHSVKGLGKTAPDPATATTTLDGVEVPLNGISTGINDTCLLYNEEYIVYDV  
 hs7 NPHNPTDLFDSVTN-----NTRSPKLFVVFFD  
 hs8 NPQNPTDLYDTVTD-----NVHHPSL<sup>F</sup>VAFYD  
 mm8 DPQNAADLYDTVTD-----NDKNPSI<sup>F</sup>VVFYD  
 hs9 SP-GAIDGHDSVVD-----NVSSPET<sup>F</sup>VIFSG  
 mm9 SP-GALDVNDSVVD-----NVSSPET<sup>F</sup>IVVFNG  
 hs10 GPGHVLLRYDSA<sup>V</sup>D-----CICQPSIFVIFHD  
 mm10 VSG-QVLRYS<sup>A</sup>VD-----CLQQPRIFVIFHD  
 cons . \*:::----- \* : \* \* .  
 pr7 CCCCCCCCCCCCC-----CCCCCEEEEECC  
 conf 77888876666577-----8888833788769

β6

1a26 GGEEE EEEEEEEEE -----  
 1a26 AQVNLKYLLKLFNYKTS-----  
 hs7 NQAYPEYLITFTA-----  
 hs8 YQAYPEYLITFRK-----  
 mm8 NQTYPEYLITFRQ-----  
 hs9 MQAIPQYLWTCTQEY-----VQSQDYSSGPMRPFQAHPWRGFGASGSPVD  
 mm9 MQAMPLYLWTCTQDR-TFSQHMPWSQGYSSGPMVSSLSQSEWVVLNGSSV-  
 hs10 TQALP<sup>T</sup>HLITCEHVPRASPDDPSGLPGRSPD<sup>T</sup>-----  
 mm10 TQALP<sup>T</sup>HLITCKNILPGTP-----  
 cons \* : \* : \* \*  
 pr7 CEECEEEEEEEEC-----  
 conf 6733289777749-----
