# Supplementary material for: In silico characterization of the family of PARP-like poly(ADP-ribosyl)transferases (pARTs)
Source: PubMed Central journal article supplement (PMC1266365; doi:10.1186/1471-2164-6-139), 2005-10-04
Supplement: 1471-2164-6-139-S7.pdf [file 1471-2164-6-139-S7.pdf]

```

1a26 HHHHHHHHHHT STTTTEEEEE EEEEEEE-TTHH-HHHGGGGSS EEEEEEE GGH
1a26 AKIIKQYVKNTHAATHNAYDLKVVEIFRIER-EGES-QRYKPFQQLHNRQLLW HGSRTNPF
hs15 FEKIQKLTGAPHTPV-PAPDF----LFEIEYFDPAN-AKFYETKGERDLIYAF HGSRLNPF
mm15 FEKIQQLTGAPHTPV-PTPDF----LFEIEYFDPAN-SRFYETKGERDLIYAF HGSRLNPF
hs16 QLKFM---HTPHQ-----FLLSSPPAKESNFRAAKLFGSTFAF HGSHIENW
mm16 QLKFM---HTPHQ-----FLLSSPPAKESNFRAAKLFGSTFAF HGSHIENW
hs17 -LKFM---HTSHQ-----FLLSSPPAKEARFRTAKKLYGSTFAF HGSHIENW
mm17 -LKFM---HTSHQ-----FLLSSPPAKEARFRTAKKLYGSTFAF HGSHIENW
cons * : : * - ---- * : **: : * : * . :*****: **
pr15 CCHHHHHHCCCCC-CCCC---EEEEEECCC-HHHHHHHCCCCCEEEECCHHH
conf 911432006798877-88410---47787605323-578975115784677607621457
pr16 CCCC---CCCE-----EEEECCCHHHHHHHHHCCCCCEEEECCHHH
conf 98765---77314-----77840782111211011057884588626625667

```

β2 α2

```

1a26 HHHHH S T-TTGGGTTT SEEEESSHHTTSS SSS -----
1a26 AGILSQGLRIAPP-EAPVTGYMFGKGI YFADMVSKSANYCHTSQADP-----
hs15 HSIIHNLGHCH--LNKT--SLFGEGTYLTSDSLALIYSPHGHGWQ-----
mm15 HSIIHNLGHCH--LNKT--SLFGEGTYLTSDSLALIYSPHGHGWQ-----
hs16 HSIILRNLVVASNTRLQLHGAMYGSGI YLSPMSSISFGYSGMKNKQKVSA-KDEPASSKS
mm16 HSIILRNLVVASNTRLQLHGAMYGSGI YLSPMSSISFGYSGMKNKQKVSS-KDEPASSKS
hs17 HSIILRNLVNASYTKLQLHGAAYGKGI YLSPISSISFGYSGMKGQHRMPSKDELVQRYNR
mm17 HSIILRNLVNASYTKLQLHGAAYGKGI YLSPISSISFGYSGMKGQHRMPSKDELVQRYNR
cons ***:*** : : : * * * : : * : : * : :
pr15 HHHHHHHHEE---ECC-EEEEEEECCCHHHHHHHCCCCCCCC-----
conf 99875201024---2051--788634773322301310148998754-----
pr16 HHHHHHCCCCCCCCCCCCCCCCCEEECCCHHHHHHHHHCCCCCCCCCH-HCCCCCCCC
conf 7777317341778853345651005057535033321000367871110-0000000034

```

β3

β4

```

1a26 -----EEEEEEEEEE SEEEESS SS TT EEEE BSEEE TTT
1a26 -----IGLILLGEVALGNMYELKNASHITKLPKGGKHSVKGLGKTAPDPTA
hs15 HSLLGPIILSCVAVCEVIDHPDVKQCQTKKKSKE-----IDRRRARIKH----
mm15 HSLLGPIILSCVAVCEVIDHPDVKQCQIKKKSKE-----IDRSRARIKH----
hs16 SNT-SQSQKKGQSQFLQSRNLKCIALCEVITS-----SDLHKHGE-----
mm16 SNA-SQSQKKGQSQFLQSRNLKCIALCEVITS-----PDLHKHGE-----
hs17 MNTIPOTRSIQ--SRFLQSRNLKCIALCEVITS-----KDLQKHGN-----
mm17 MNTIPOTRSIQ--SRFLQSRNLKCIALCEVITS-----KDLQKHGN-----
cons . . . . : : : * : : . * :
pr15 HHHHHHHHHHHHHHHCCCCCEEEECCHHHHHHHCCCCCCCC-----CCCEEEEEE-----
conf 013322243311001207876301100102400-----1442113440-----
pr16 CCC-CCCCCCCCCCCCCCCCCEEEECCHHHHHHHHHCCCCCCCC-----CCCEEC-----
conf 222-44346773201014776103443320178-----66254351-----

```

β5

β6

```

1a26 EETTEEE EEE S S SBSB EEEES GGEEEE EEEEEEEEE -----
1a26 TTTLDGVEVPLNGISTGINDTCLLYNEYIVYDVAQVNLKYLKLFNYKTS-----
hs15 -----SEGDIIPK YFVVTNNQLLRVKYLLVYSQKPPKRAPSQLSWFS
mm15 -----SEGGEIIPK YFVVTNNQLLRVKYLLVYSQKPKRASSQLSWLS
hs16 -----IWVVPNTDHVCTRFFFV YEDGQVGDAN
mm16 -----IWVVPNTDHVCTRFFFV YEDGQVGDAN
hs17 -----IWVCPVSDHVCTRFFFV YEDGQVGDAN
mm17 -----IWVCPVSDHVCTRFFFV YEDGQVGDAN
cons : * . : : : : : * : *
pr15 -----CCCCCCCCCEEEECCEEEECCEEEECCEEEECCEEEECCEEEECCEEE
conf -----689988840488707837888888763677757778863012
pr16 -----EEEEECCEEEECCEEEECCEEEECCEEEECCEEEECCEEEECCEEE
conf -----689616764240268986078113452-----

```

```

1a26 -----
1a26 -----
hs15 SHWFTVMISLYLLLLLIVSVINSSAFQHFWRRAKR
mm15 SHWFMVIMSLYLLLLLIVSVTNSSAFHHFWRVNR
hs16 ----INTQEGGIHKEILRVIGDQTATG-----
mm16 ----INTQEGGIHKEILRVIGNQTATG-----
hs17 ----INTQDPKIQKEIMRVIGTQVYTN-----
mm17 ----INTQDPKIQKEIMRVIGTQVYTN-----
cons : . : * : * . . .
pr15 EECCHHHHHHHHHHHHHHHCCCCCHHHHHHHHHHHHCC
conf 1000235667776665421143578989987439
pr16 ----CCCCCHHHHHHHHHHHHHCCCC-----
conf -----43457336788888750000369-----

```
