# Supplementary material for: In silico characterization of the family of PARP-like poly(ADP-ribosyl)transferases (pARTs)
Source: PubMed Central journal article supplement (PMC1266365; doi:10.1186/1471-2164-6-139), 2005-10-04
Supplement: 1471-2164-6-139-S8.pdf [file 1471-2164-6-139-S8.pdf]

| input                                                 | Hs.pART1  | Hs.pART9  | Hs.pART12 | Hs.pART15 | Ci.pART   |
|-------------------------------------------------------|-----------|-----------|-----------|-----------|-----------|
| iteration 1<br>=<br>traditional<br>Blastp<br>searches | At.pARTa  |           | Dd.pARTg  |           | At.pARTb  |
|                                                       | At.pARTb  |           | Dd.pARTf  |           | Dd.pARTb  |
|                                                       | Dd.pARTa  |           |           |           | Dd.pARTa  |
|                                                       | Dd.pARTb  |           |           |           |           |
|                                                       | Dd.pARTc  |           |           |           |           |
|                                                       | Dd.pARTd  |           |           |           |           |
|                                                       | At.pARTc  |           |           |           |           |
|                                                       | Dd.pARTE  |           |           |           |           |
| iteration 2                                           | Dd.pARTf  | Dd.pARTg  | Dd.pARTc  | Dd.pARTd  | At.pARTa  |
|                                                       | Dd.pARTg  | Dd.pARTf  | At.pARTb  |           | Dd.pARTc  |
|                                                       | At.pARTd  | Dd.pARTc  | At.pARTa  |           | Dd.pARTd  |
|                                                       |           | At.pARTh  | Dd.pARTh  |           | At.pARTc  |
|                                                       |           | At.pARTa  | Dd.pARTa  |           | Dd.pARTe  |
|                                                       |           | Dd.pARTh  | At.pARTg  |           | Dd.pARTf  |
|                                                       |           | At.pARTb  | Dd.pARTb  |           |           |
|                                                       |           | Dd.pARTb  | At.pARTd  |           |           |
|                                                       |           | At.pARTg  | At.pARTf  |           |           |
|                                                       | At.pARTf  | At.pARTh  |           |           |           |
|                                                       |           | At.pARTE  |           |           |           |
| iteration 3                                           | At.pARTE  | Dd.pARTa  | Dd.pARTd  | At.pARTb  | Dd.pARTg  |
|                                                       | At.pARTf  | At.pARTd  | Dd.pARTE  | At.pARTa  | At.pARTd  |
|                                                       |           | At.pARTE  | At.pARTi  | Dd.pARTa  | At.pARTE  |
|                                                       |           | Dd.pARTd  | At.pARTc  | Dd.pARTb  |           |
|                                                       |           | Dd.pARTE  | Dd.pARTi  | Dd.pARTc  |           |
|                                                       |           | At.pARTi  |           | Dd.pARTE  |           |
|                                                       |           |           | Dd.pARTf  |           |           |
| iteration 4                                           | At.pARTg  | At.pARTc  | At.pARTj  | At.pARTc  | At.pARTf  |
|                                                       | At.pARTh  | At.pARTj  |           | Dd.pARTg  | At.pARTg  |
|                                                       |           |           |           | At.pARTd  | At.pARTh  |
|                                                       |           |           |           | At.pARTE  |           |
| iteration 5                                           | At.pARTi  |           |           | At.pARTf  | At.pARTi  |
|                                                       |           |           |           | At.pARTh  |           |
| iteration 6                                           | converged |           |           | At.pARTg  | converged |
| iteration 7                                           |           | converged | converged | At.pARTi  |           |
| iteration 8                                           |           |           |           | converged |           |
