# Supplementary material for: In silico characterization of the family of PARP-like poly(ADP-ribosyl)transferases (pARTs)
Source: BMC Genomics. 2005 Oct 4;6:139. doi: 10.1186/1471-2164-6-139 (PMC1266365; doi:10.1186/1471-2164-6-139)
Supplement: Additional File 6 — Multiple amino acid sequence alignments, secondary structure predictions, and threading results for pART subgroup 4 A multiple sequence alignment was generated for the catalytic domains of pARTs 11–14 with T-Coffee. Residues, identities, intron positions, and secondary structure units are marked as in additional file 3. Indicated secondary structure predictions were generated for human pART11 (pr11) with PSIPRED. [file 1471-2164-6-139-S6.pdf]

1a26 EEE TTSHHHHHHHHHHHT STTTTEEEEE EEEEEETTHHHHGGGGSS-----  
1a26 IKVVDKDSEEAIIKQYVKNTHAATHNAYDLKVEIFRIEREGESQRYKPFKQLH-----  
hs11 LIPLHNQTHEYNEVANLFGKTMDRNR-----IKRIQRIQNLDLWEFFCRKKAQLKKKRGV  
mm11 LVSLQNQTHEYNEVASLFGKTMDRNR-----IKRIQRIQNLDLWEFFCRKKAQLKKKRGV  
hs12 KITLSSSSEYYQKVWNLFNRTLPHYF-----VQKIERVQNLALWEVYQWQKQMQKQNGG  
mm12 KITLSSSSEYYQKVWNIFNRTLPHYF-----VQKIERIQNMGLWEVYQWQKQMQKQNGG  
hs13 LSEIHHLHPEYVRVSEHFKASMKQFK-----IEKIKKIENSELLDKFTWKKSQMKEE---  
mm13 FIELNNQDEEYAKISEQFKASMKQFK-----IVTIKRIWNQKLWDTFERKKQKMKNK---  
hs14 QVPVSAEDKSYRIIYNLFHKTVPFQYR---ILQILRVQNQFLWEKYKRKKEYMNRKMFQ  
mm14 QVPVSAEDKSYRIIYNLFHKTVPFQYR---ILQILRVQNQFLWEKYKRKKEYMNRKMSG  
cons : . \* : . \* :: ----: \* :: \* \* : : : \* :::  
pr11 CCCCCCCCCHHHHHHHHHHHHCCCCCE-----EEEEEEECCHHHHHHHHHHHHHHHHHHCC  
conf 97267788478999999861179833-----68988704877889999999999987168

B1 B2 α2  
1a26 ----- EEEEEEE GGGHHHHHHH S TTTTGGGTTT SSEEESSHHHHHHTTS  
1a26 -----NRQLLWHGSRSTTNFAGILSQGLRIAPPEAPVTGYMFGKGIYFADMVSKSANYCHTS  
hs11 PQ--INEQMLFHGTSSEFVEAICIHNFQWR--INGIHGAVFGKCTYFARDAAYSSRFCKDD  
mm11 PQ--INEQMLFHGTSSEFVEAICIHNFQWR--INGVHGAVFGKCTYFARDAAYSSRFCKDD  
hs12 KA--VDERQLFHGTSAIFVDAICQQNFQWR--VCGVHGTSYGKGSYFARDAAYSHHYSKSD  
mm12 KE--VDERQLFHGTSANFVDAICQQNFQWR--VCGLHGTSYGKGSYFARDAAYSHHYSKSD  
hs13 -----GKLLFYATSRAYVESICSNNFQSF--LHETHENKYGKGIYFAKDAIYSHKNCQPYD  
mm13 -----TEMFLFHAVGRIHMDYICKNNFEWI--LHGNREIRYKGNFYFTEAMYSHKSCSYD  
hs14 RDRIINERHLFHGTSQDVVDGICKHNFQPR--VCGKHATMFGQGSYFAKKASYSHNFSSKS  
mm14 RDRIINERHLFHGTSQDVVDGICKHNFQPR--VCGKHATMFGQGSYFAKKASYSHNFSSKS  
cons \*\*:... :: \*\* :\*: --: : :\*: \* \*: :. \* . .  
pr11 CC--CCEEEECCCCHHHHHHHHHHHCCCCC--CCCCCCCCCCCCCEEECCCHHHHHHCCCCC  
conf 97--21153210688789999998178988--67877872256021100134554046666

B3  
1a26 SSS -----EEEEEEEE SSEEES SS ----- TT -  
1a26 QADP-----IGLILLGEVALGNMYELKNASHITKL-----PKGKH-  
hs11 IKHGNTFQIHGVSLLQQRHLFRITYKSMFLARVLIGDYINGDSKYMRPPSKDGSY--VNLYD-  
mm11 IKHGNTFQIHGVSLLQQRHLFRITYKSMFLARVLIGDYINGDSKYMRPPSKDGSY--VNLYD-  
hs12 TQ-----THTMFLARVLVGDFVRGNASVFRPPAKEGWS--NAFYD-  
mm12 TH-----SHMMFLARVLVGDFVRGSTSFVRPPAKEGQS--NAFYD-  
hs13 AK-----NVVMFVAQVLVGKFTTEGNITYTSPPP-----QFD-  
mm13 SR-----GTVMFVARVLVGSVIEGNMTLSPPA-----LYD-  
hs14 SKG-----VHFMFLAKVLTGRYTMGSHGMRPPPPVNPQSVTSDLYD-  
mm14 SKG-----VHFMFLAKVLTGRYTMGSHGMRPPPPVNPQSVTSDLYD-  
cons : \*\*:\*:\* \* \* . \*\* . :\*-  
pr11 CCCCCCCCCCCCCCCCCCCCCCEEEEEEECCCCCCCCCCCCCECCCCCCCCC--CCCC-  
conf 5666544322222212101365127885210356325885526668987875--34457-

B4 B5 B6  
1a26 EEEE BSEEE TTT EEETEEEE EEE S S SBSB EEEES GGEEEE EEEEEEE  
1a26 SVKGLGKTAPDPTATTTLDGVEVPLNGNISTGINDTCLLYNEYIVYDVAQVNLKYLLKLKF  
hs11 SCVD-----DTWNPKIFVVFVDANQIYPEYLIDFH-  
mm11 SCVD-----DTWNPKIFVVFVDANQIYPEYLIDFH-  
hs12 SCVN-----SVSDPSIFVIFEKHQVYPEYVIQYTT  
mm12 SCVN-----SMSDPTIFVVFEEKHQVYPEYLIQYST  
hs13 SCVD-----TRSNPSVFVIFQKDQVYPQYVIEYTE  
mm13 SCVD-----TRLNPSVFVIFRKEQIYPEYVIEYME  
hs14 SCVD-----NFFEPQIFVIFNDDQSYPIFYIYQEE  
mm14 SCVD-----NFFEPQIFVIFNDDQSYPIFYIYQEE  
cons \*\*\*:-:----- : \* :\*: \* . \* \*\* :\*: :  
pr11 CCCC-----CCCCCEEEEEEECCCCCEEEEEEEEEEEEC-  
conf 7567-----8658705898848574137877758-

1a26 EE -----  
1a26 NYKTS-----  
hs11 -----  
mm11 -----  
hs12 SSKPSVTPSILLALGSLFSSRQ  
mm12 SSKPPASPSIFVALGNLFTSRQ  
hs13 DKACV-----IS---  
mm13 LEKEK-----GCIIS---  
hs14 VSNTVSI-----  
mm14 VSNTVSI-----  
cons -----  
pr11 -----  
conf -----
